other reports some technical difficulties in getting the data.<sup>2</sup> Needle visualization was an issue in both reports. Using an out-of-plane approach may have prevented proper needle visualization because only a cross section of the needle anywhere in the length of the needle may be seen and mistaken for the tip, although tissue movement may have been seen. With the in-plane approach used in the other report, needle artifacts may have prevented proper visualization, which will only be discerned when the injectate spread is noticed. Both reports mention distortion of tissues, one due to probe pressure and the other due to local anesthetic already injected.

There is no documentation in either of the reports of having seen other vessels in the proximity before the actual needle placement. Assuming they used color flow Doppler, the default settings for the color Doppler cannot detect small vessels unless the color velocity range and the angle of steering are adjusted. It is possible that they did not visualize the needle during the performance of the block and hence did not adhere to one of the safety principles that they have mentioned. Any of these situations could have led to the complication. Most importantly, they were both performed by residents.

My practice is to perform a preliminary scout scan, including a color flow study, to visualize the target and its associated neighboring structures and demonstrate to the trainee. This permits proper guidance during the actual performance of the block. Could they have avoided the intravascular injection by using landmarks or nerve stimulation? Probably not.

To elevate ultrasound-guided to the next level and call it a "bullet-proof technique" by the more "vocal proponents" is a dream awaiting fruition with some more technological advancements and changes in needle design. In the meantime, adhering to some basic principles will avoid potential complications. To blame the ultrasound for complications due to technical and possibly inadequate training is, in my opinion, tarnishing a useful technique without understanding its ad-

vantages and mainly its limitations. There is an increasing need for a proper curriculum and training to fully understand the technique, the potential pitfalls, and the complications of ultrasound-guided blocks.<sup>9</sup>

**Hariharan Shankar, M.B.B.S.,** Clement Zablocki VA Medical Center and Medical College of Wisconsin, Milwaukee, Wisconsin. hshankar@mcw.edu

## References

1. Loubert C, Williams SR, Helie F, Arcand G: Complication during ultrasound-guided regional block: Accidental intravascular injection of local anesthetic. *ANESTHESIOLOGY* 2008; 108:759-60
2. Zetlaoui PJ, Labbe JP, Benhamou D: Ultrasound guidance for axillary plexus block does not prevent intravascular injection. *ANESTHESIOLOGY* 2008; 108:761
3. Russon K, Blanco R: Accidental intraneural injection into the musculocutaneous nerve visualized with ultrasound. *Anesth Analg* 2007; 105:1504-5
4. Schaffhalter-Zoppoth I, Zeitz ID, Gray AT: Inadvertent femoral nerve impalement and intraneural injection visualized by ultrasound. *Anesth Analg* 2004; 99:627-8
5. Koff MD, Cohen JA, McIntyre JJ, Carr CF, Sites BD: Severe brachial plexopathy after an ultrasound-guided single-injection nerve block for total shoulder arthroplasty in a patient with multiple sclerosis. *ANESTHESIOLOGY* 2008; 108:325-8
6. Hadzic A, Sala-Blanch X, Xu D: Ultrasound guidance may reduce but not eliminate complications of peripheral nerve blocks. *ANESTHESIOLOGY* 2008; 108:557-8
7. Sites BD, Brull R, Chan VW, Spence BC, Gallagher J, Beach ML, Sites VR, Hartman GS: Artifacts and pitfall errors associated with ultrasound-guided regional anesthesia, part I: Understanding the basic principles of ultrasound physics and machine operations. *Reg Anesth Pain Med* 2007; 32:412-8
8. Sites BD, Brull R, Chan VW, Spence BC, Gallagher J, Beach ML, Sites VR, Abbas S, Hartman GS: Artifacts and pitfall errors associated with ultrasound-guided regional anesthesia, part II: A pictorial approach to understanding and avoidance. *Reg Anesth Pain Med* 2007; 32:419-33
9. Tsui BC: "Credentials" in ultrasound-guided regional blocks. *Reg Anesth Pain Med* 2006; 31:587-8

(Accepted for publication August 7, 2008.)

*Anesthesiology* 2008; 109:1143-4

Copyright © 2008, the American Society of Anesthesiologists, Inc. Lippincott Williams & Wilkins, Inc.

## Accidental Intravascular Injection of Local Anesthetic?

*To the Editor:*—I read with great interest the recent case report detailed by Loubert *et al.*<sup>1</sup> I respectfully disagree with their conclusion of this being a case of local anesthetic toxicity. Presuming, based on their case description, that only 5 ml local anesthetic was injected into a blood vessel and minimal perivascular uptake occurred from the previous injections, a maximum of 75 mg lidocaine was inadvertently injected intravascularly.<sup>1</sup> This amount of local anesthetic is unlikely to produce the necessary blood levels to create central nervous system symptoms.<sup>2</sup>

An alternative explanation is that the associated intravascular administration of epinephrine, which expectedly caused a hypertensive response, disrupted the blood-brain barrier and the defective blood-brain barrier produced sufficient cerebral edema to generate the witnessed symptoms.<sup>3</sup> The patient's symptoms of agitation and loss of consciousness were likely from hypertensive encephalopathy or reversible posterior leukoencephalopathy syndrome.<sup>1,4</sup> Clinical manifestations of both of these hypertensive-related syndromes overlap with central nervous system local anesthetic toxicity and include restlessness, confusion, altered consciousness, seizures, and coma.<sup>3,4</sup> These symptoms stem from altered cerebral autoregulation and endothelial dysfunction.<sup>3</sup>

The patient, assumed from her American Society of Anesthesiologist physical status of I to be normotensive, had a documented blood pressure of 280/130 mmHg during the described symptoms.<sup>1</sup> Hypertensive encephalopathy has been seen with diastolic readings of as low as 100 mmHg in patients without preexisting hyperten-

sion.<sup>4</sup> As blood pressure exceeds the threshold of cerebral autoregulation, a hyperperfusion situation exists that may disturb the blood-brain barrier and cause cerebral edema.<sup>5</sup> The resultant cerebral edema can lead to symptoms not dissimilar to those described by the patient in question.<sup>5</sup> In cases of autoregulatory failure, the rate of blood pressure elevation is pivotal in the pathogenesis of both hypertensive encephalopathy and reversible posterior leukoencephalopathy syndrome.<sup>6</sup> A rapid increase in blood pressure, from the alleged intravascular epinephrine, was no doubt present in the case report.<sup>1</sup> Neuroimaging, although not performed in this case, may have revealed cerebral edema.<sup>7</sup> When cerebral edema is primarily localized into the posterior cerebral hemispheres and is coupled with the clinical picture of restlessness, confusion, altered consciousness, seizures, or coma, a diagnosis of reversible posterior leukoencephalopathy syndrome should be entertained.<sup>7</sup> With reversible posterior leukoencephalopathy syndrome, a complete recovery is typically seen after blood pressure is controlled and stabilized.<sup>3</sup>

It seems that the rapid onset and offset of symptoms in this case would likely correlate with epinephrine, not lidocaine or bupivacaine, serum levels. Patient symptomatology paralleled the elevation and subsequent normalization of the recorded blood pressures. In summary, I propose the intravascular epinephrine provided a positive stress test to the patient's blood-brain barrier and that the concomitantly intravenously administered local anesthetic may have been an inert bystander.

**Todd W. Nelson, M.D.**, Memorial North Hospital, Colorado Springs, Colorado. nelsontmd@gmail.com

## References

1. Loubert C, Williams SR, Hélie F, Arcand G: Complication during ultrasound-guided regional block: Accidental intravascular injection of local anesthetic. *ANESTHESIOLOGY* 2008; 108:759-60
2. Rosenberg PH, Veering BT, Urney WF: Maximum recommended doses of local anesthetics: A multifactorial concept. *Reg Anesth Pain Med* 2004; 29: 564-75

3. Hinchey J, Chaves C, Appignani B, Breen J, Pao L, Wang A, Pessin MS, Lamy C, Mas JL, Caplan LR: A reversible posterior leukoencephalopathy syndrome. *N Engl J Med* 1996; 334:494-500
4. Strandgaard S, Paulson OB: Cerebral blood flow and its pathophysiology in hypertension. *Am J Hypertens* 1989; 2:486-92
5. Vaughan CJ, Delanty N: Hypertensive emergencies. *Lancet* 2000; 356:411-7
6. Mohr JP, Choi DW, Grotta JC, Weir B, Wolf PA, editors: *Stroke: Pathophysiology, Diagnosis, and Management*, 4th edition. New York, WB Saunders, 2004
7. Lamy C, Oppenheim C, Méder JF, Mas JL: Neuroimaging in posterior reversible encephalopathy syndrome. *J Neuroimaging* 2004; 14:89-96

(Accepted for publication August 7, 2008.)

Anesthesiology 2008; 109:1144

Copyright © 2008, the American Society of Anesthesiologists, Inc. Lippincott Williams & Wilkins, Inc.

*In Reply:*—We thank Drs. Brull *et al.*, Shankar, and Nelson for responding to our case report of accidental intravascular injection of local anesthetic and epinephrine during ultrasound-guided perivascular axillary block.<sup>1</sup>

The suggestions provided by Dr. Brull's group for improved safety during ultrasound-guided axillary block seem reasonable. The large case series of axillary blocks recently published by Dr. Brull *et al.* bears witness to their experience of significantly reduced (but not completely eliminated) rates of accidental intravascular injection with the adoption of ultrasound guidance compared with the blind transarterial or neurostimulator-guided techniques used and taught until recently at their institution.<sup>2</sup> Further large case series such as theirs, or the establishment of a complication registry will be needed to quantify the relative safety benefits of various preblock precautions and ultrasound-guided approaches to axillary blockade (including perivascular *vs.* perineural injection). However, there seems to be little doubt that future improvements in block safety lie in the optimal application of ultrasound training and imaging, and technical advances including echogenic atraumatic needles specifically designed for regional anesthesia.

To Dr. Shankar, the problems we wished to highlight in our case report include modification of anatomical relations by injection of local anesthetic leading to migration of the needle tip into a blood vessel, and the existence of small, compressible, low-flow veins that are difficult to detect with even the most sophisticated ultrasonic equipment, experienced operators, and careful scanning techniques. These problems may be mitigated by technical and educational improvements, but we wished to emphasize that continued adherence to traditional safety rules such as fractionated injection is necessary even in the ultrasound age of regional anesthesia. Blaming ultrasound guid-

ance for the complication we present in our report would constitute in our opinion a misinterpretation of the events we related.

Dr. Nelson brings up the interesting point that 75-100 mg lidocaine would not be expected to result in the neurologic symptoms presented in our report, and proposes the alternative diagnosis of hypertensive encephalopathy or reversible posterior leukoencephalopathy secondary to the epinephrine in the block solution. Although we agree that the dose of lidocaine administered intravenously was relatively small (due to fractionated injection with ultrasonographic confirmation), we believe the time course of our patients' symptoms (minutes, rather than days for the other evoked diagnostic possibilities) are more consistent with a high but transient peak concentration of lidocaine, possibly potentiated by the epinephrine in the solution.<sup>3</sup>

**Christian Loubert, M.D., Stephan R. Williams, M.D., Ph.D.\***  
\*Centre Hospitalier de l'Université de Montréal, Montréal, Québec, Canada. stephan.williams@umontreal.ca

## References

1. Loubert C, Williams SR, Hélie F, Arcand G: Complication during ultrasound-guided regional block: Accidental intravascular injection of local anesthetic. *ANESTHESIOLOGY* 2008; 108:759-60
2. Lo N, Brull R, Perlas A, Chan VW, McCartney CJ, Sacco R, El-Beheiry H: Evolution of ultrasound guided axillary brachial plexus blockade: retrospective analysis of 662 blocks [Evolution du bloc du plexus brachial par approche axillaire sous échoguidage: une analyse retrospective de 662 blocs]. *Can J Anaesth* 2008; 55:408-13
3. Takahashi R, Oda Y, Tanaka K, Morishima HO, Inoue K, Asada A: Epinephrine increases the extracellular lidocaine concentration in the brain: A possible mechanism for increased central nervous system toxicity. *ANESTHESIOLOGY* 2006; 105:984-9

(Accepted for publication August 7, 2008.)

Anesthesiology 2008; 109:1144-5

Copyright © 2008, the American Society of Anesthesiologists, Inc. Lippincott Williams & Wilkins, Inc.

*In Reply:*—We appreciate the interest of Drs. Brull *et al.* and Dr. Shankar in our case report<sup>1</sup> and we welcome their comments. Obviously, however, the fact that these two groups have not yet experienced any severe complication during ultrasound-guided blocks is by no means proof that their suggestions can eliminate this risk. As well as long series, reports of incidents can be helpful in improving patient safety. Thousands and thousands of safe blocks were performed before the pivotal report of Albright<sup>2</sup> about deaths related to intravascular injection of local anesthetics, and 4 more years elapsed before the test dose technique of Moore and Batra<sup>3</sup> was described. Ultrasound guidance is a recent step in regional anesthesia, and not all problems have yet been reported, discussed, and resolved. For example, the reports of inadvertent, painless, and uncomplicated intraneural injections during ultrasound-guided blocks have opened a new field of discussions in regional anesthesia.

However, we agree with most of the recommendations of Drs. Brull *et al.* and Dr. Shankar because they are logical. According to their

comments, we can list some propositions to try to improve patients' safety during ultrasound-guided blocks.

First, as mentioned by Dr. Shankar, ultrasound is only a tool—a new tool for anesthesiologists. We have the obligation to learn and to train to use this new tool efficiently and safely.

Second, basic safety rules have to be respected, such as the respect of aseptic techniques in ultrasound-guided blocks, and even under ultrasound, patients should remain awake or only judiciously sedated.

Third, a preliminary large scout scan to visualize the nerves and neighboring structures, including a color flow study, is required. This is probably the better way to find the precise puncture site and to avoid unintentional vascular punctures.

Fourth, visualization of the needle tip is probably more important than visualization of the whole length of the needle. All needles are not created equal with regard to ultrasound,<sup>4</sup> and in our experience, we found that the tip of Tuohy-like needles is more often identified on the
